# Supplementary material
Source: HighWire-hosted journal article supplement (https://erj.ersjournals.com/content/55/5/2001112)
Supplement: inline-supplementary-material-1 [file inline-supplementary-material-1.pdf]

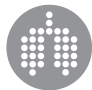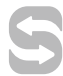

SHAREABLE PDF

AGORA

RESEARCH LETTER

ERJ European Respiratory Journal Eur Respir J 0903-1936/1399-3003 European Respiratory Society 10.1183/13993003.01112-2020 ERJ-01112-2020 AGORA RESEARCH LETTER

Association between age and clinical characteristics and outcomes of COVID-19. LIU ET AL. RESEARCH LETTER Age, clinical characteristics and outcomes of COVID-19

Liu Yang<sup>1,13</sup>, Mao Bei<sup>1,13</sup>, Liang Shuo<sup>1,13</sup>, Yang Jia-Wei<sup>1,13</sup>, Lu Hai-Wen<sup>1,13</sup>, Chai Yan-Hua<sup>1,13</sup>, Wang Lan<sup>2</sup>, Zhang Li<sup>1</sup>, Li Qiu-Hong<sup>1</sup>, Zhao Lan<sup>1</sup>, He Yan<sup>1</sup>, Gu Xiao-Long<sup>3</sup>, Ji Xiao-Bin<sup>4</sup>, Li Li<sup>5</sup>, Jie Zhi-Jun<sup>6</sup>, Li Qiang<sup>7</sup>, Li Xiang-Yang<sup>8</sup>, Lu Hong-Zhou<sup>9</sup>, Zhang Wen-Hong<sup>10</sup>, Song Yuan-Lin<sup>11</sup>, Qu Jie-Ming<sup>12,14</sup>, Xu Jin-Fu<sup>1,14</sup>, on behalf of the Shanghai Clinical Treatment Experts Group for COVID-19

1Dept of Respiratory and Critical Care Medicine, Shanghai Pulmonary Hospital, Tongji University School of Medicine, Shanghai, China. 2Dept of Pulmonary Circulation Medicine, Shanghai Pulmonary Hospital, Tongji University School of Medicine, Shanghai, China. 3Dept of Respiratory Medicine, Shanghai Pudong New Area People's Hospital, Shanghai, China. 4Dept of Respiratory Medicine, Zhoupu Hospital of Pudong New District, Shanghai, China. 5Dept of Respiratory Medicine, Baoshan District Hospital of Integrated Traditional Chinese and Western Medicine, Shanghai, China. 6Dept of Respiratory and Critical Care Medicine, Shanghai Fifth People's Hospital, Fudan University, Shanghai, China. 7Dept of Respiratory and Critical Care Medicine, Shanghai East Hospital, Tongji University, Shanghai, China. 8Dept of Respiratory and Critical Care Medicine, Huadong Hospital, Fudan University, Shanghai, China. 9Shanghai Public Health Clinical Center, Shanghai, China. 10Dept of Infectious Disease, Huashan Hospital Fudan University, Shanghai, China. 11Dept of Respiratory and Critical Care Medicine, Zhongshan Hospital Fudan University, Shanghai, China. 12Dept of Respiratory and Critical Care Medicine, Ruijin Hospital, Shanghai Jiaotong University School of Medicine, Shanghai, China. 13These authors contributed equally. 14These authors contributed equally.

**Correspondence:** Jin-Fu Xu, Dept of Respiratory and Critical Care Medicine, Shanghai Pulmonary Hospital, Tongji University School of Medicine, No. 507 Zhengmin Road, Shanghai, China. E-mail: jfxucn@163.com 2020202055020032020110420202020

#### To the Editor:

The rapid outbreak of coronavirus disease 2019 (COVID-19) has been a matter of international concern as the disease is spreading fast [1, 2]. Considering that the contagious disease has led to an enormous impact globally, there is an urgent need to identify the risk populations with poor prognosis. Ageing is associated with certain changes in pulmonary physiology, pathology and function, during the period of lung infection. Therefore, age-related differences in responsiveness and tolerance become obvious and lead to worse clinical outcomes in elderly individuals [3]. Previous studies have mentioned that older COVID-19 patients are at an increased risk of death [4–7]. However, the age-related clinical characteristics, disease courses and outcomes other than death in COVID-19 patients remain unclear.
